# Supplementary material for: How climate, landscape, and economic changes increase the exposure of Echinococcus Spp
Source: BMC Public Health. 2022 Dec 10;22:2315. doi: 10.1186/s12889-022-14803-4 (PMC9741777; doi:10.1186/s12889-022-14803-4)
Supplement: Supplementary file 1 — Additional file 1. Excel A 1. Geographical distribution of echococcosis [file 12889_2022_14803_MOESM1_ESM.xlsx]

## Sheet: discode
Excel A 1 Geographical distribution of echococcosis
City	Administrative division	Code	District	Number of patients
Lanzhou	Lanzhou urban district	1	Chengguan District	22
			Xigu District	8
			Qilihe District	40
			Anning District	7
			Honggu District	1
	Yongdeng County	2	\	68
	Gaolan County	3	\	5
	Yuzhong County	4	\	2
Jiayuguan	Jiayuguan City	5	\	3
Jinchang	Jinchang urban district	6	Jinchuan District	4
	Yongchang County	7	\	26
Baiyin	Baiyin urban district	8	Baiyin District	5
			Pingchuan District	25
	Jingyuan County	9	\	17
	Huining County	10	\	44
	Jingtai County	11	\	5
Tianshui	Tianshui urban district	12	Qinzhou District	1
			Maiji District	1
	Qingshui County	13	\	1
	Qin'an County	14	\	14
	Gangu County	15	\	3
	Wushan County	16	\	2
	Zhangjiachuan Hui Autonomous County	17	\	4
Wuwei	Wuwei urban district	18	Liangzhou District	6
	Minqin County	19	\	2
	Gulang County	20	\	10
	Tianzhu Tibetan Autonomous County	21	\	27
Zhangye	Zhangye urban district	22	Ganzhou District	2
	Sunan Yugur Autonomous County	23	\	3
	Minle County	24	\	3
	Linze County	25	\	0
	Gaotai County	26	\	0
	Shandan County	27	\	16
Pingliang	Pingliang urban district	28	Kongtong District	0
	Jingchuan County	29	\	1
	Lingtai County	30	\	0
	Chongxin County	31	\	0
	Zhuanglang County	32	\	2
	Jingning County	33	\	3
	Huating City	34	\	2
Jiuquan	Jiuquan urban district	35	Suzhou District	3
	Jinta County	36	\	1
	Guazhou County	37	\	4
	Subei Mongolian Autonomous County	38	\	3
	Aksai Kazakh Autonomous County	39	\	1
	Yumen City	40	\	2
	Dunhuang	41	\	24
Qingyang	Qingyang urban district	42	Xifeng District	0
	Qingcheng County	43	\	0
	Huan County	44	\	2
	Huachi County	45	\	2
	Heshui County	46	\	2
	Zhengning County	47	\	3
	Ning County	48	\	0
	Zhenyuan County	49	\	1
Dingxi	Dingxi urban district	50	Anding District	3
	Tongwei County	51	\	3
	Longxi County	52	\	3
	Weiyuan County	53	\	1
	Lintao County	54	\	2
	Zhang County	55	\	9
	Min County	56	\	4
Longxi	Longxi urban district	57	Wudu District	4
	Cheng County	58	\	4
	Wen County	59	\	4
	Dangchang County	60	\	1
	Kang County	61	\	2
	Xihe County	62	\	0
	Li County	63	\	3
	Hui County	64	\	4
	Liangdang County	65	\	0
Linxia	Linxia city	66	\	3
	Linxia County	67	\	5
	Kangle County	68	\	8
	Yongjing County	69	\	5
	Guanghe County	70	\	13
	Hezheng County	71	\	3
	Dongxiang Autonomous County	72	\	6
	Jishishan Baoan and Dongxiang Salar Autonomous County	73	\	3
Gannan	Hezuo City	74	\	13
	Lintan County	75	\	7
	Zonny County	76	\	4
	Zhouqu County	77	\	1
	Diebu County	78	\	7
	Maqu County	79	\	18
	Luqu County	80	\	8
	Xiahe County	81	\	25
